# Supplementary material for: Measurement of endotracheal tube secretions volume by micro computed tomography (MicroCT) scan: an experimental and clinical study
Source: PubMed Central journal article supplement (PMC3986655; doi:10.1186/1471-2253-14-22), 2014-03-28
Supplement: 1471-2253-14-22-S4.pdf [file 1471-2253-14-22-S4.pdf]

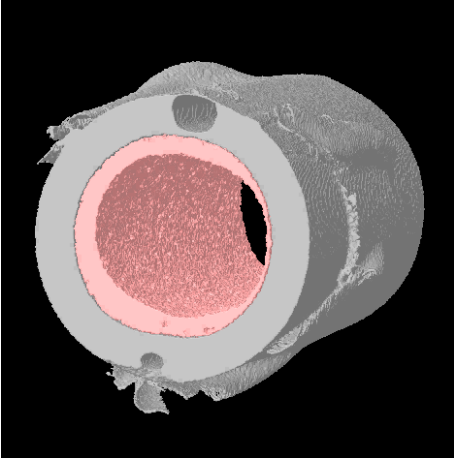

**Figure E2** Exemplary 3d-reconstruction of MicroCT scan of an ETT portion. The layer of secretions present on the inner lumen in the cuff portion is highlighted in light red.
