# Supplementary material for: Measurement of endotracheal tube secretions volume by micro computed tomography (MicroCT) scan: an experimental and clinical study
Source: PubMed Central journal article supplement (PMC3986655; doi:10.1186/1471-2253-14-22), 2014-03-28
Supplement: 1471-2253-14-22-S5.pdf [file 1471-2253-14-22-S5.pdf]

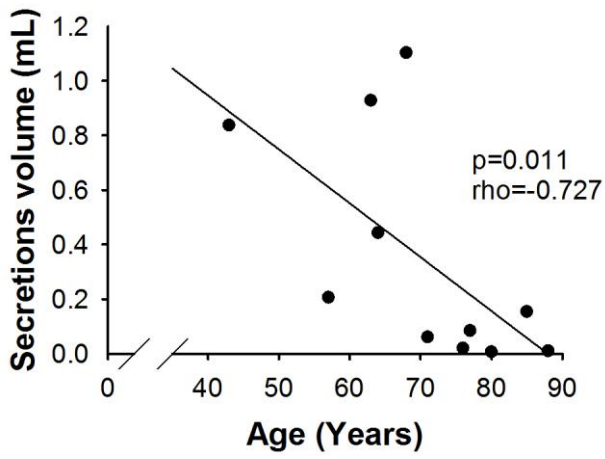

**Figure E3** Association between patient's age and secretions volume present within the ETT. The highest secretion amounts were measured in ETTs of younger patients.
